# Supplementary material
Source: Springer Nature journal article supplement (https://www.springermedizin.de/resource/supplementary/12865_2010_314_MOESM7_ESM.pdf/9427732)
Supplement: MOESM7 [file 9427732]

# Suppl. Fig.: HLA-DR expression on circulating monocyte subsets

## CD14<sup>++</sup>CD16<sup>-</sup> monocytes

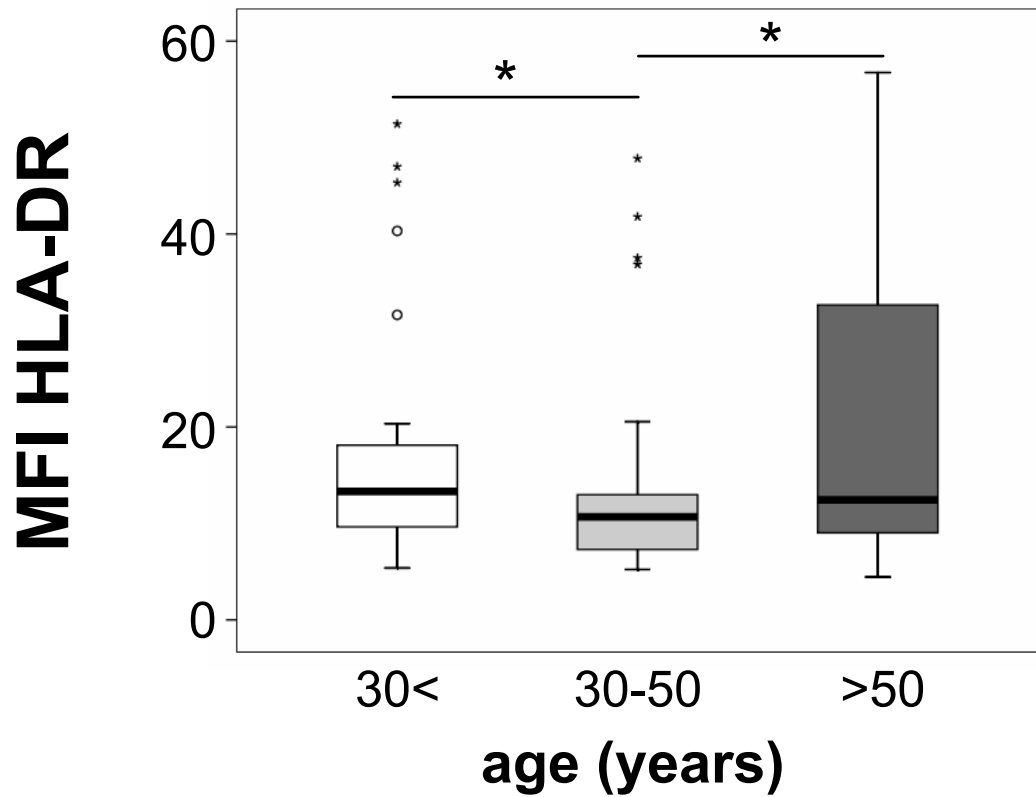

## CD14<sup>+</sup>CD16<sup>+</sup> monocytes

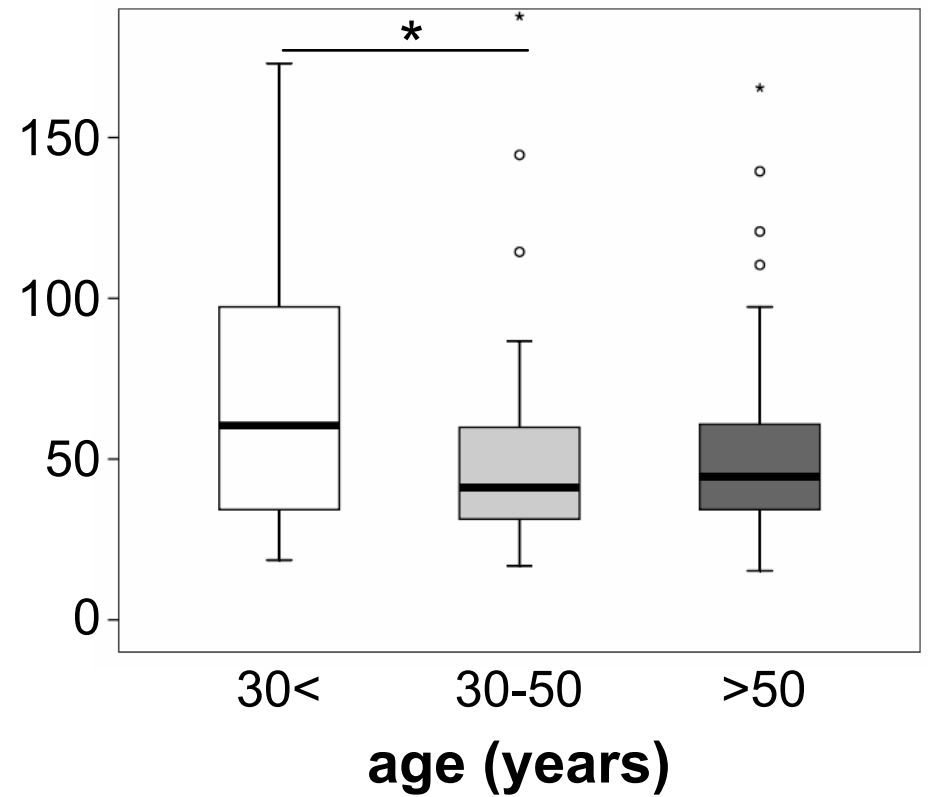

\*p<0.05
